# Supplementary material for: Impact of patient and public involvement on enrolment and retention in clinical trials: systematic review and meta-analysis
Source: PubMed Central journal article supplement (PMC6259046; doi:10.1136/bmj.k4738), 2018-11-28
Supplement: croj045186.ww1.pdf [file croj045186.ww1.pdf]

## Appendix 1: Search strategy

|   | Search domain                                                    | Search terms                                                                                                                                                                                                                                                                                                                                                                                                                                                                                                                                                                                                                                                                                                                                                                                                                                                                                                   |
|---|------------------------------------------------------------------|----------------------------------------------------------------------------------------------------------------------------------------------------------------------------------------------------------------------------------------------------------------------------------------------------------------------------------------------------------------------------------------------------------------------------------------------------------------------------------------------------------------------------------------------------------------------------------------------------------------------------------------------------------------------------------------------------------------------------------------------------------------------------------------------------------------------------------------------------------------------------------------------------------------|
| 1 | Clinical trials                                                  | trial*.mp OR exp Clinical Trial as Topic/                                                                                                                                                                                                                                                                                                                                                                                                                                                                                                                                                                                                                                                                                                                                                                                                                                                                      |
| 2 | PPI & recruitment/retention, with focus on PPI                   | ((consumer? or citizen? or client? or carer? or communit? or lay or patient? or public? or service user? or survivor? or stakeholder? or family or families or relative? or parent?) AND (involv* or collaborat* or engage* or partner* or consult* or advis* or emancipat* or empower* or advocat* or embed* or represent*) OR community-based OR participatory).ti OR *Consumer Participation/ OR *Patient Participation/ OR *Community-Based Participatory Research/<br><b>AND</b><br>Patient Selection/ OR exp Informed Consent/ OR Research design/ OR Patient Dropouts/ OR enrol*.ab./freq=2 OR recruit*.ab./freq=2 OR participat*.ab./freq=2 OR enlist*.ab./freq=2 OR consent*.ab./freq=2 OR refus*.ab./freq=2 OR accru*.ab./freq=2 OR retention.ab./freq=2 OR attrition.ab./freq=2 OR followup.ab./freq=2 OR follow-up.ab./freq=2 OR dropout*.ab./freq=2 OR drop-out*.ab./freq=2 OR withdr*.ab./freq=2 |
| 3 | PPI & recruitment/retention, with focus on recruitment/retention | ((consumer? or citizen? or client? or carer? or communit* or lay or patient? or public? or service user? or survivor? or stakeholder? or family or families or relative? or parent?) adj3 (involv* or collaborat* or engage* or partner* or consult* or advis* or emancipat* or empower* or advocat* or embed* or represent*) or community-based or participatory).ab,ti OR Consumer Participation/ OR Patient Participation/ OR Community-Based Participatory Research/<br><b>AND</b><br>*Patient Selection/ OR *Informed Consent/ OR *Informed Consent By Minors OR *Research design/ OR *Patient Dropouts/ OR (enrol* OR recruit* OR participat* OR enlist* OR consent* OR refus* OR accru* OR retention OR attrition OR followup OR follow-up OR dropout* OR drop-out* OR withdr*).ti                                                                                                                      |
| 4 | 2 or 3                                                           |                                                                                                                                                                                                                                                                                                                                                                                                                                                                                                                                                                                                                                                                                                                                                                                                                                                                                                                |
| 5 | PPI outcomes                                                     | (impact* or effect* or adapt* or modif* or change* or develop* or design* improve* or worse* or increase* or boost* or decreas* or reduc* or differ* or edit* or suggest*).ab,ti                                                                                                                                                                                                                                                                                                                                                                                                                                                                                                                                                                                                                                                                                                                               |
| 6 | 1 and 4 and 5                                                    |                                                                                                                                                                                                                                                                                                                                                                                                                                                                                                                                                                                                                                                                                                                                                                                                                                                                                                                |

## Appendix 2: Forest plots showing subgroup analyses for enrolment outcome

(a) Enrolment rate denominator (pre vs. post eligibility screening)

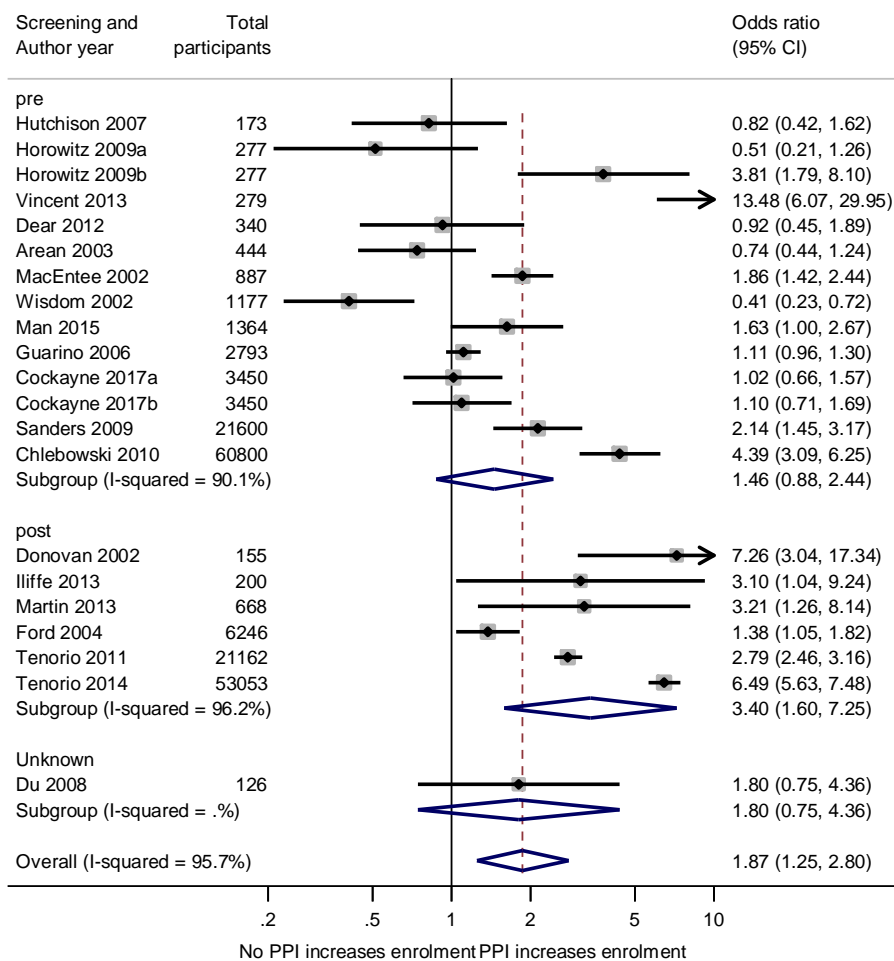

## (b) Trial recruitment setting (context)

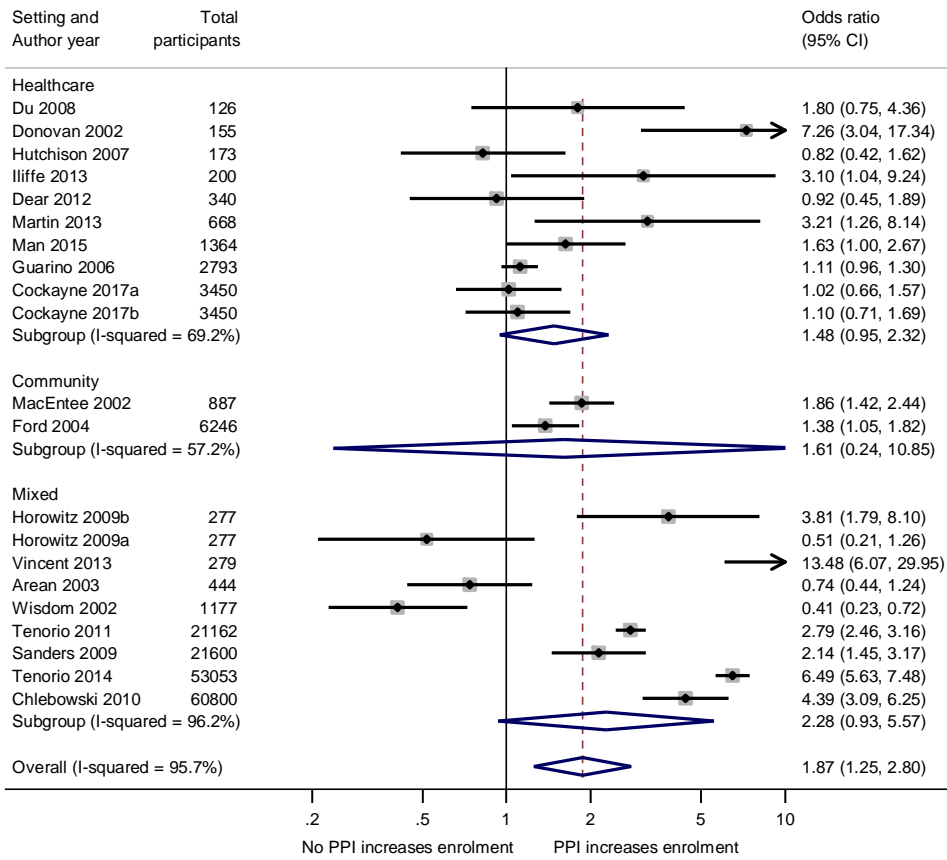

### (c) Trial intervention type (context)

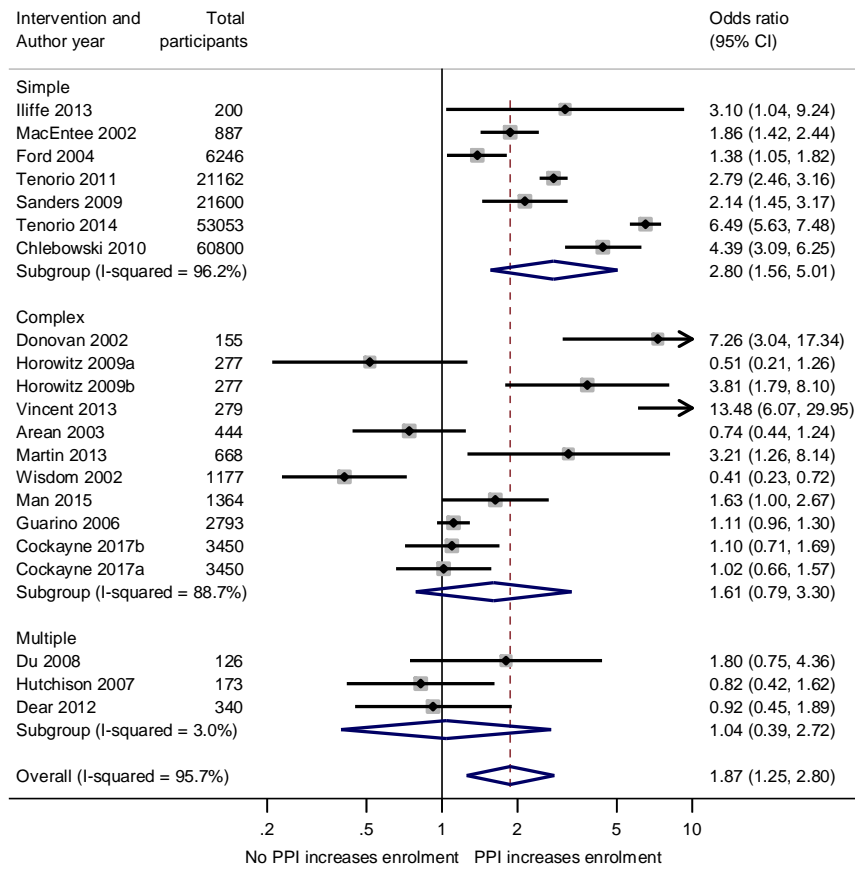

(d) PPI in choosing research question/topic (context)

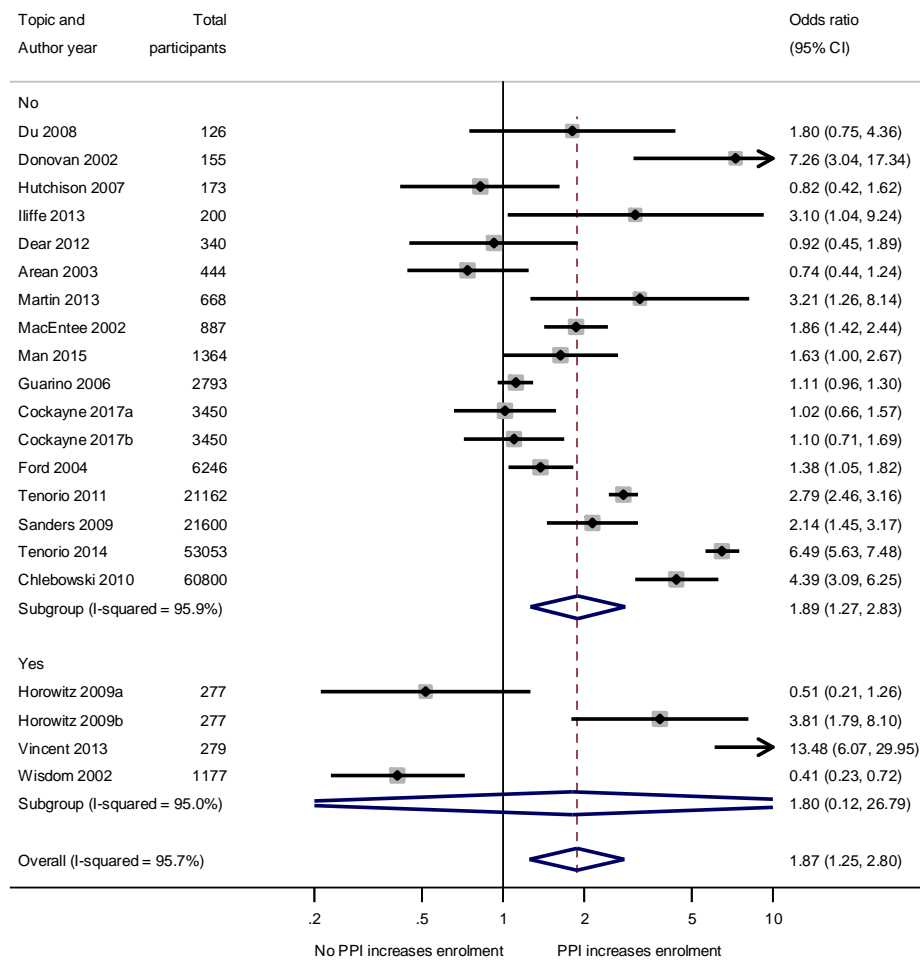

### (e) Timing/activity of PPI intervention

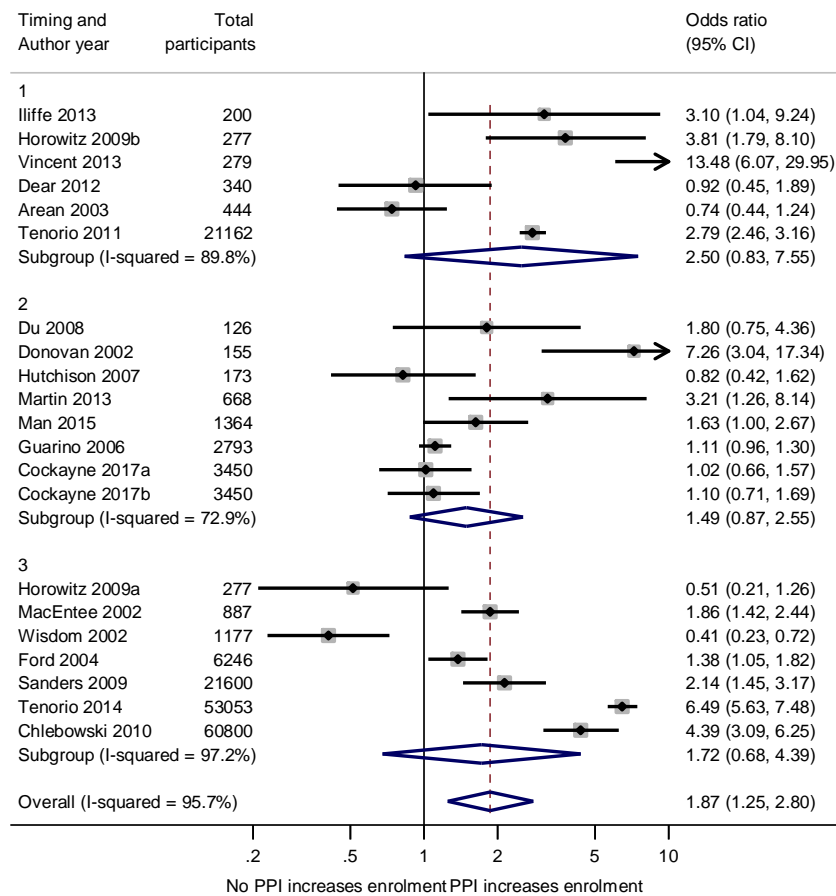

**Key:**

- 1 = designing recruitment or retention strategy
- 2 = developing patient-facing information
- 3 = directly approaching / recruiting or retaining participants

(f) Number of the activities (e) targeted by PPI intervention

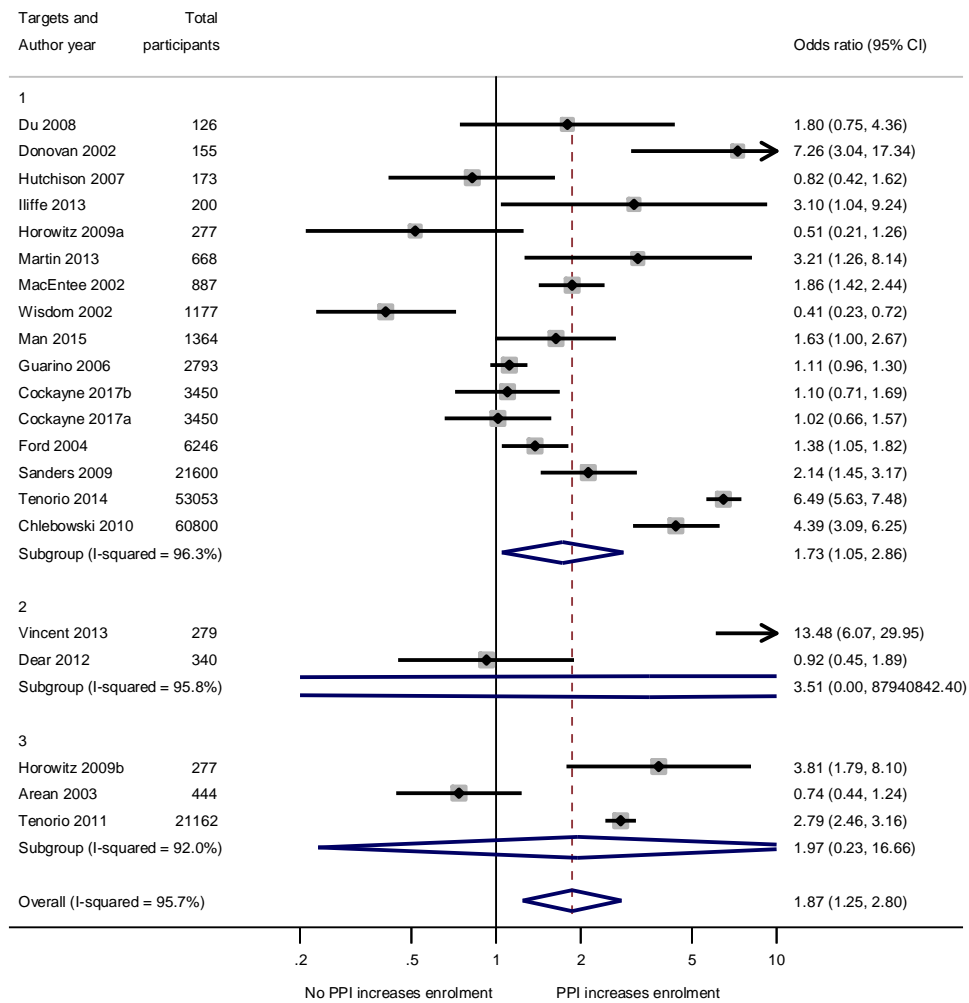

(g) PPI intervention chosen/designed specifically to increase recruitment or retention

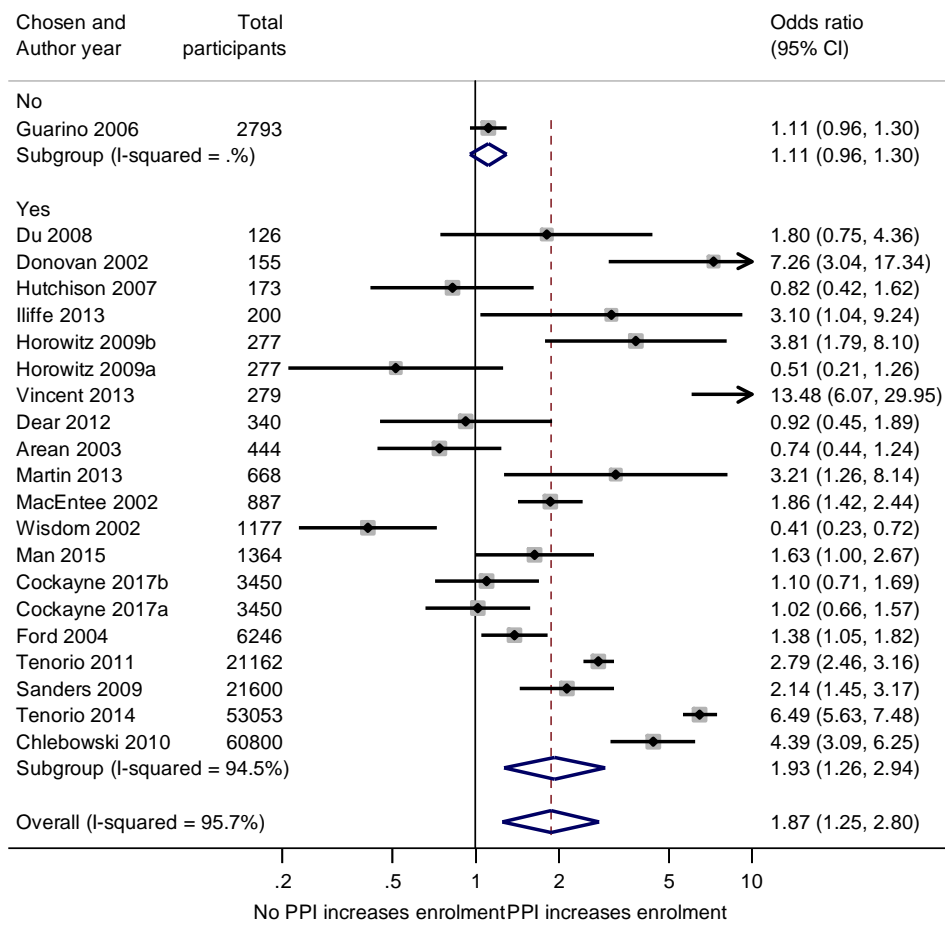



## (h) PPI model

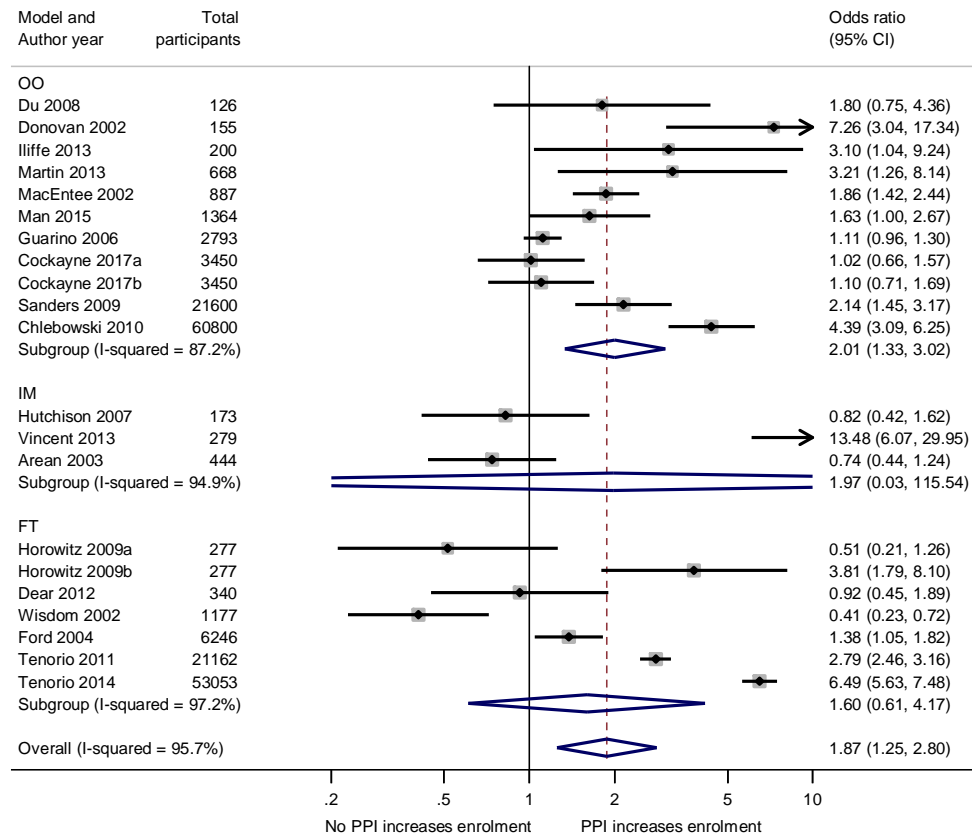

Key:

OO = One-off

IM = Intermittent

FT = Full team membership

(i) Number of PPI contributors involved

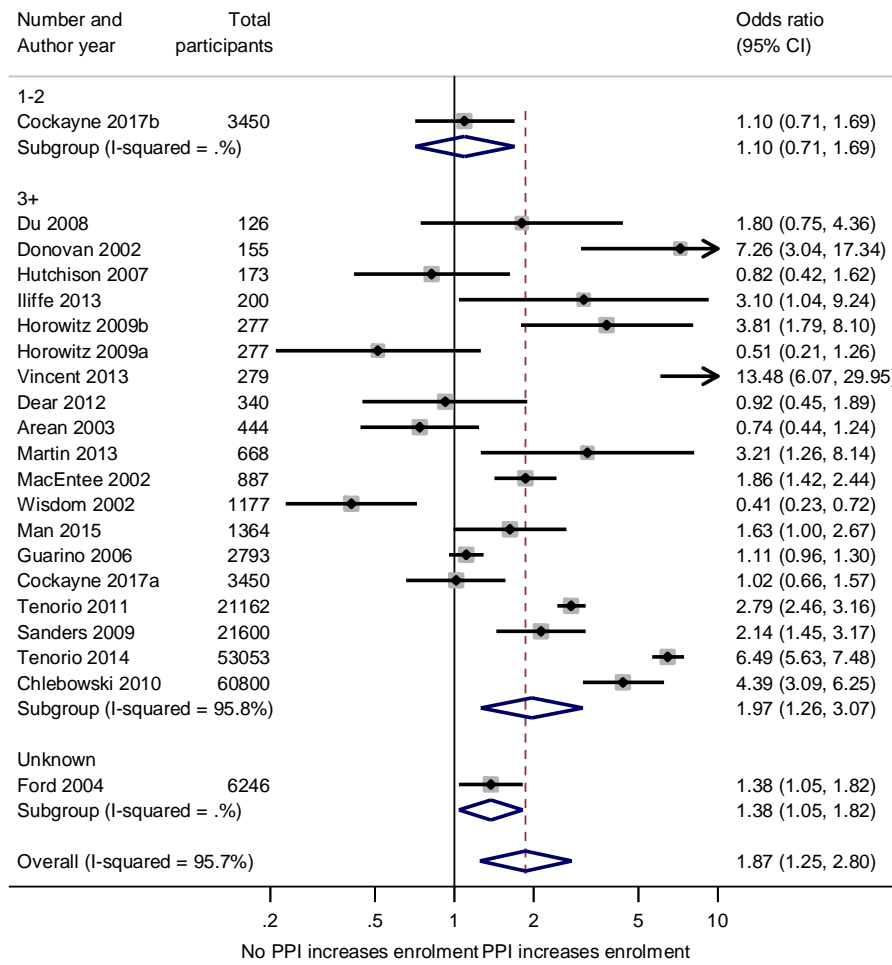

### (j) Lived experience

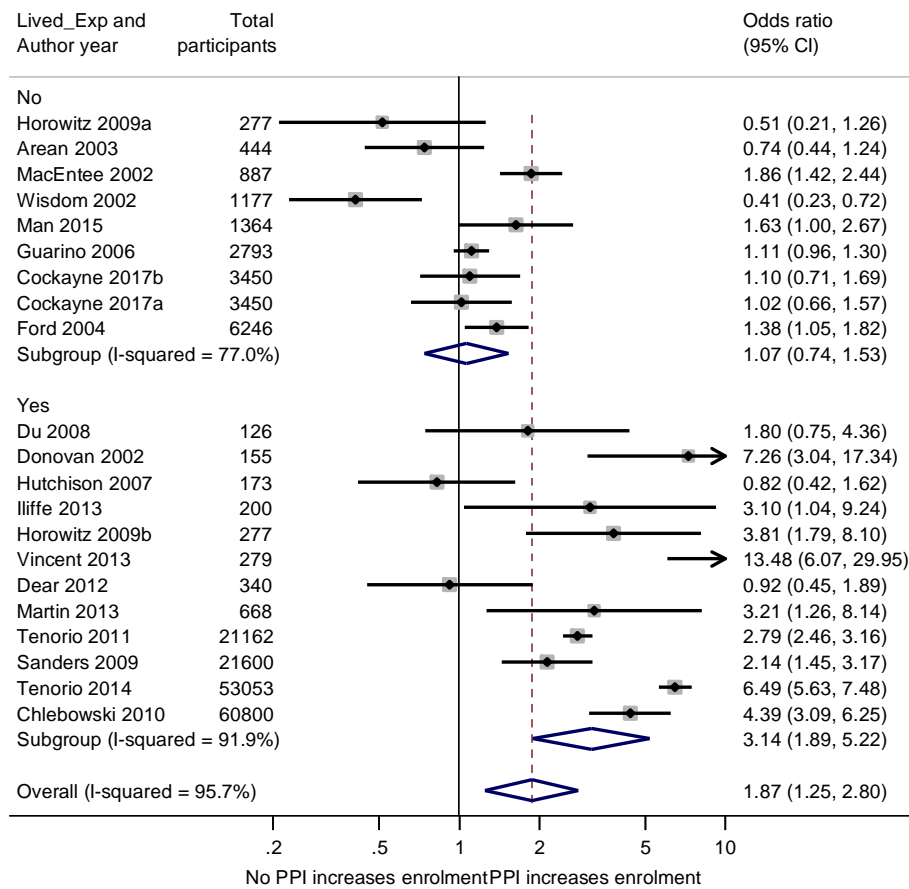

(k) PPI visible to potential trial participants

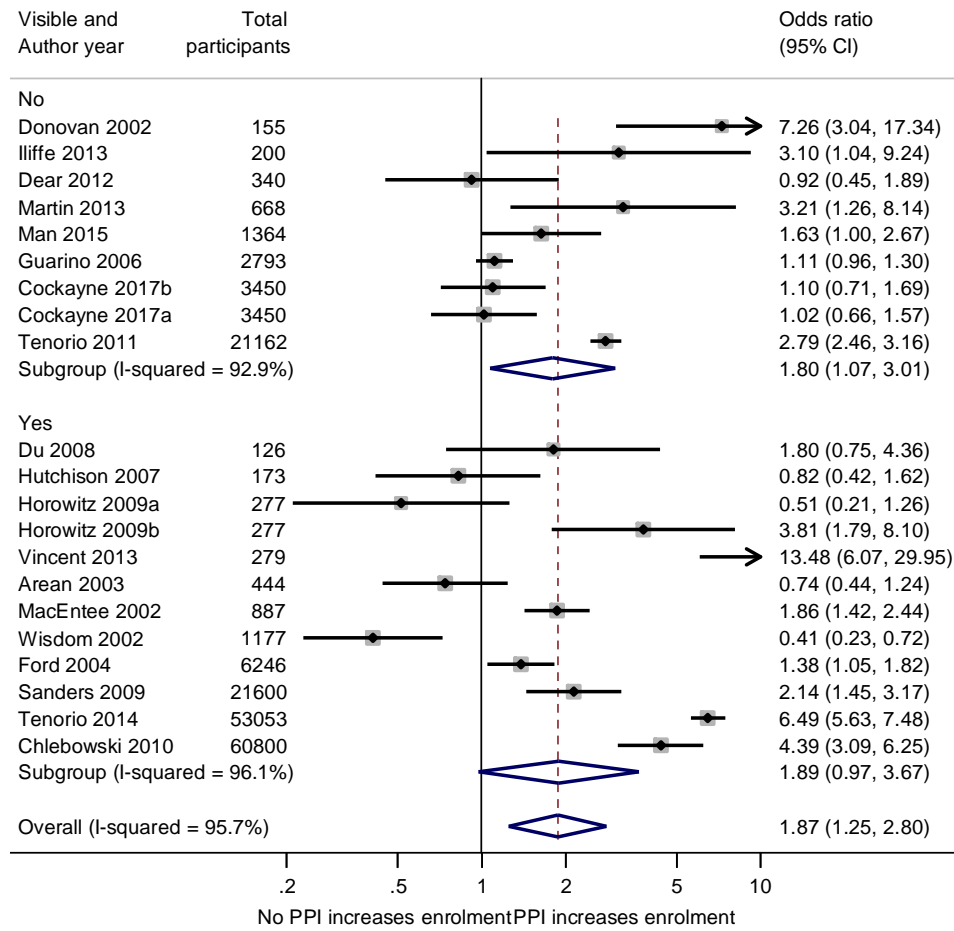

### Appendix 3: Results of sensitivity analyses for enrolment outcome

#### a) Main analysis (randomised studies only)

| Sensitivity analysis                                                  | Number of comparisons remaining (out of total 8) | Estimated OR (95% CI) | p-value |
|-----------------------------------------------------------------------|--------------------------------------------------|-----------------------|---------|
| Excluding studies at high risk of bias                                | 7                                                | 1.17 (1.01-1.35)      | 0.036   |
| Excluding small studies (N<100)                                       | 8                                                | 1.16 (1.01-1.34)      | 0.035   |
| Excluding PPI interventions with non-PPI components                   | 1                                                | -                     | -       |
| Excluding formal qualitative research interventions                   | 8                                                | 1.16 (1.01-1.34)      | 0.035   |
| Excluding studies using a proxy denominator to measure enrolment rate | 8                                                | 1.16 (1.01-1.34)      | 0.035   |

#### b) Secondary analysis (randomised and non-randomised studies combined)

| Sensitivity analysis                                                  | Number of comparisons remaining (out of total 21) | Estimated OR (95% CI) | p-value |
|-----------------------------------------------------------------------|---------------------------------------------------|-----------------------|---------|
| Excluding studies at high risk of bias                                | 7                                                 | 1.17 (1.01 – 1.32)    | 0.036   |
| Excluding small studies (N<100)                                       | 21                                                | 1.87 (1.25 – 2.80)    | 0.004   |
| Excluding PPI interventions with non-PPI components                   | 6                                                 | 2.70 (0.83 – 8.84)    | 0.084   |
| Excluding formal qualitative research interventions                   | 20                                                | 1.77 (1.18 – 2.64)    | 0.008   |
| Excluding studies using a proxy denominator to measure enrolment rate | 18                                                | 1.63 (1.06 – 2.52)    | 0.029   |

**Appendix 4: Forest plot showing odds ratios for participant retention with vs. without PPI intervention (randomised studies only)**

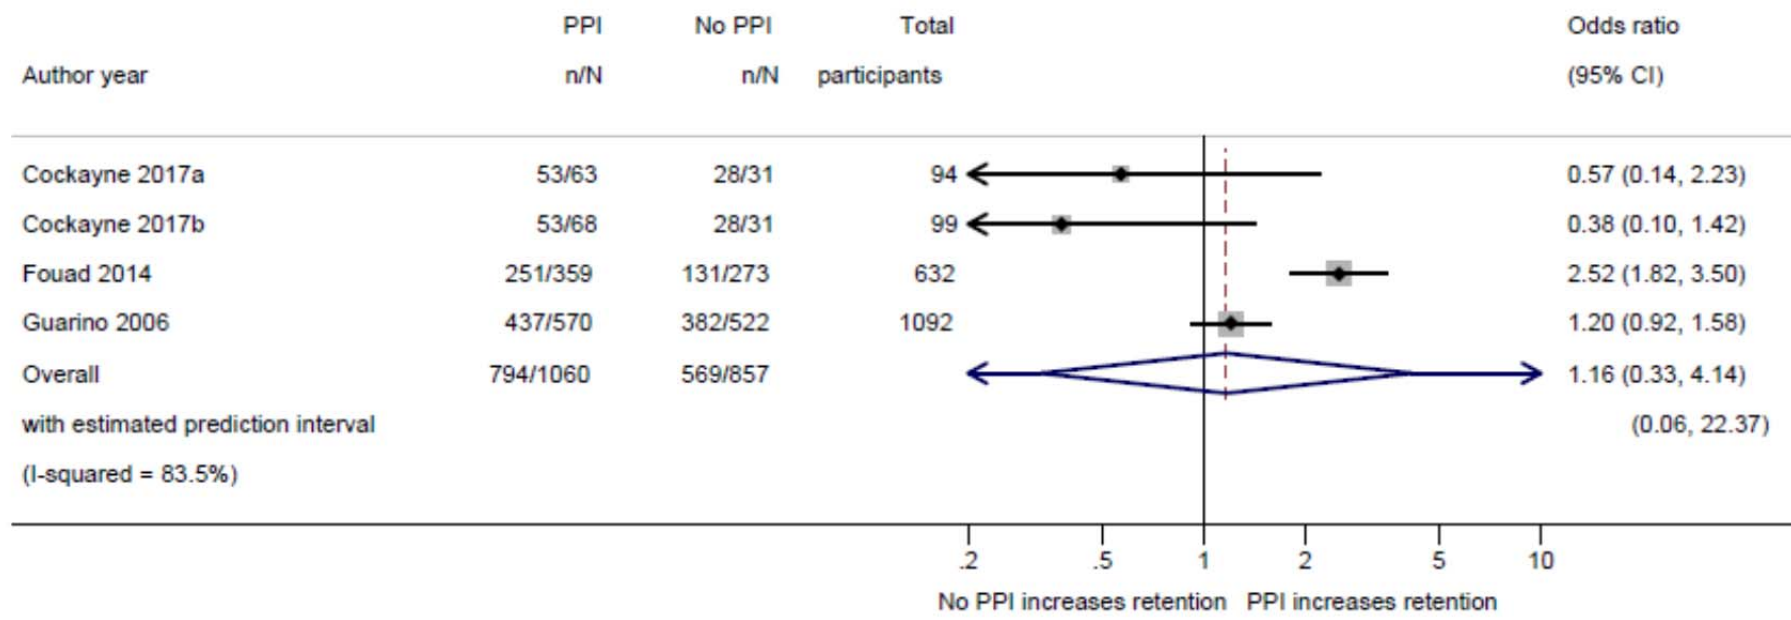

**Appendix 5: Forest plot showing odds ratios for participant retention with PPI intervention vs. no PPI or non-PPI intervention (randomised and non-randomised studies combined)**

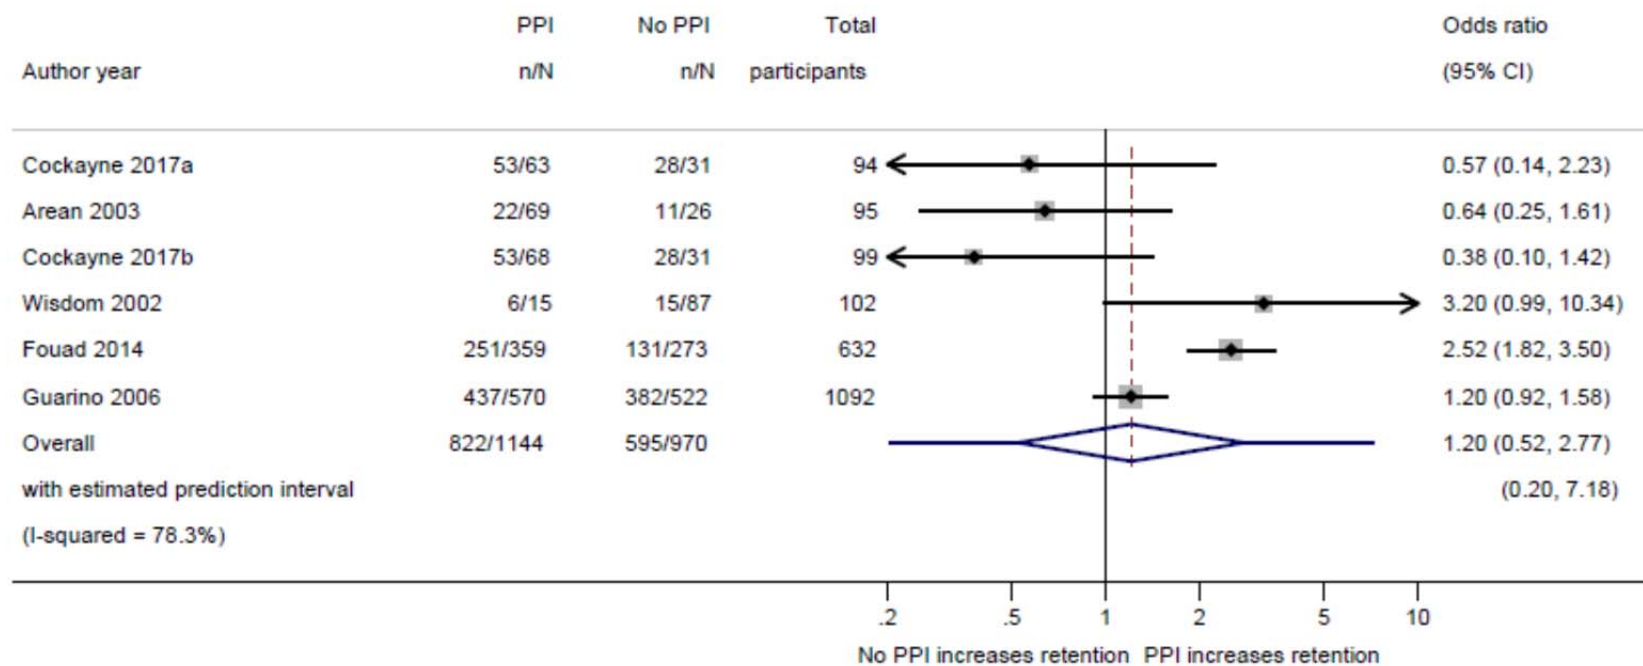

## Appendix 6: Results of sensitivity analyses for retention outcome

### a) Main analysis (randomised studies only)

| Sensitivity analysis                                | Number of comparisons remaining (out of 4 total) | Estimated OR (95% CI) | p-value |
|-----------------------------------------------------|--------------------------------------------------|-----------------------|---------|
| Excluding studies at high risk of bias              | 4                                                | 1.16 (0.33 – 4.14)    | 0.727   |
| Excluding small studies (N<100)                     | 4                                                | 1.16 (0.33 – 4.14)    | 0.727   |
| Excluding PPI interventions with non-PPI components | 2                                                | 1.73 (0.02 – 188.33)  | 0.377   |
| Excluding formal qualitative research interventions | 4                                                | 1.16 (0.33 – 4.14)    | 0.727   |

### b) Secondary analysis (randomised and non-randomised studies combined)

| Sensitivity analysis                                | Number of comparisons remaining (out of 6 total) | Estimated OR (95% CI) | p-value |
|-----------------------------------------------------|--------------------------------------------------|-----------------------|---------|
| Excluding studies at high risk of bias              | 4                                                | 1.16 (0.33 – 4.14)    | 0.727   |
| Excluding small studies (N<100)                     | 5                                                | 1.36 (0.50 – 3.73)    | 0.445   |
| Excluding PPI interventions with non-PPI components | 2                                                | 1.73 (0.02 – 188.33)  | 0.377   |
| Excluding formal qualitative research interventions | 6                                                | 1.20 (0.52 – 2.77)    | 0.590   |
